# Supplementary material for: RFC3 induces epithelial-mesenchymal transition in lung adenocarcinoma cells through the Wnt/β-catenin pathway and possesses prognostic value in lung adenocarcinoma
Source: PubMed Central journal article supplement — Int J Mol Med. 2019 Oct 29;44(6):2276–88. doi: 10.3892/ijmm.2019.4386 (PMC6844605; doi:10.3892/ijmm.2019.4386), 2019-10-29

Figure S1. Overexpression or knockdown of RFC3 by overexpression plasmid or siRNA, and their effect on cell proliferation. RFC3 overexpression plasmid and empty vector were transfected into the lung cancer A549 cell line. RFC3-specific siRNA and non-specific control siRNA were transfected into the lung cancer H1299 cell line. Data are presented as an average of three separate experiments.  $P > 0.05$  between the two groups at each time point. OD, optical density; RFC3, replication factor C subunit 3; siRNA, small interfering RNA.

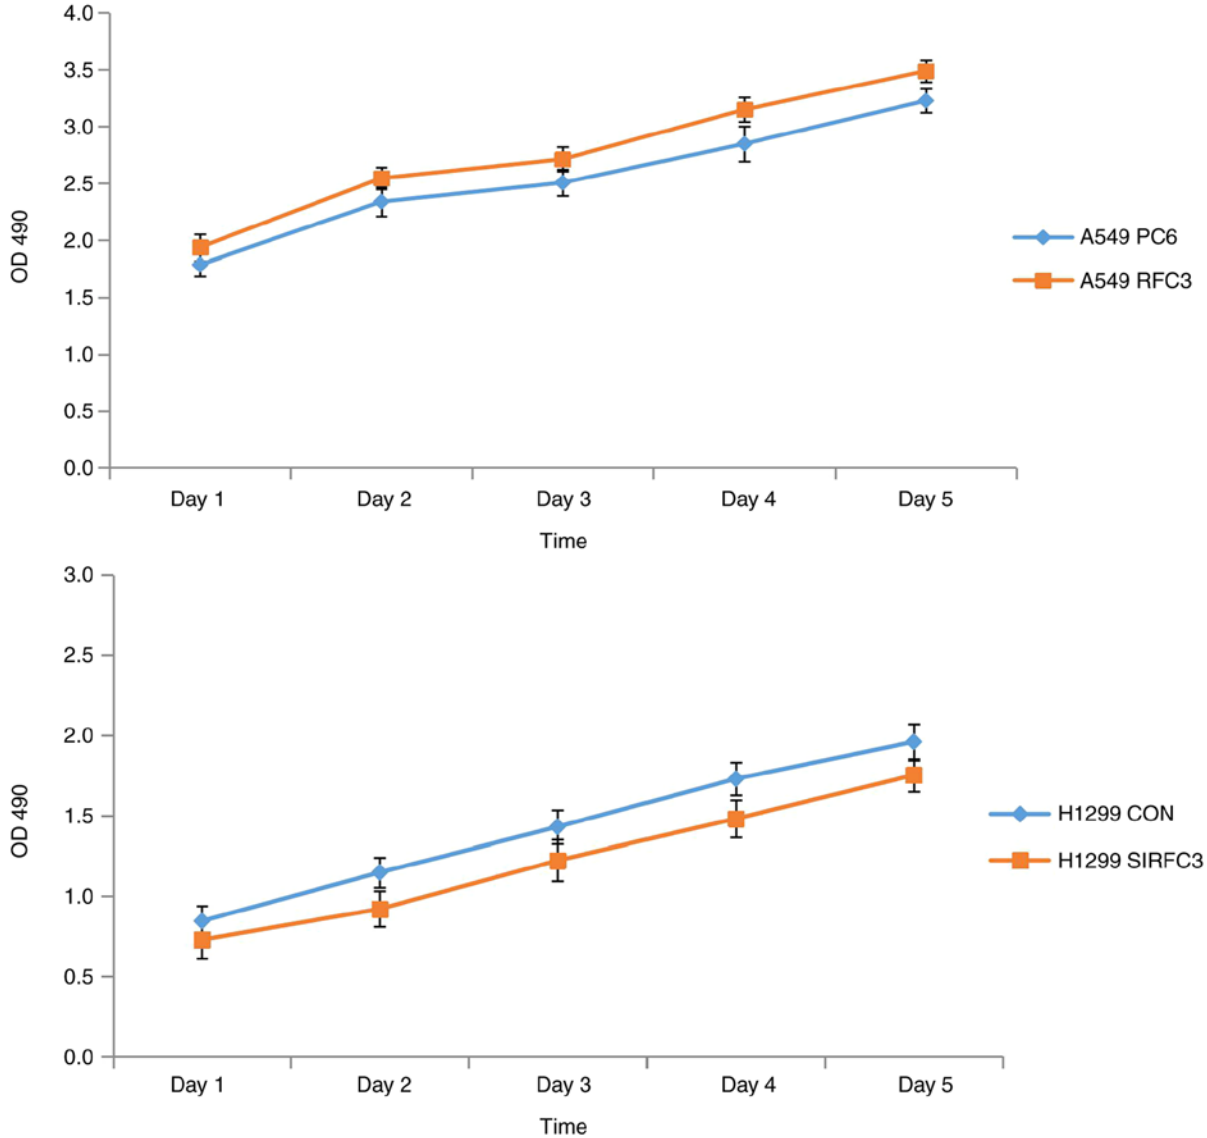

Figure S2. Overexpression or knockdown of RFC3 by overexpression plasmid or siRNA, and their effect on cell cycle progression. (A) RFC3 overexpression plasmid and empty vector were transfected into the lung cancer A549 cell line. (B) RFC3-specific siRNA and non-specific control siRNA were transfected into the lung cancer H1299 cell line. Cell cycle was assessed by flow cytometry. Representative images of flow cytometry data are shown and results of three separate experiments were quantified. \* $P < 0.05$ . PI, propidium iodide; RFC3, replication factor C subunit 3; siRNA, small interfering RNA.

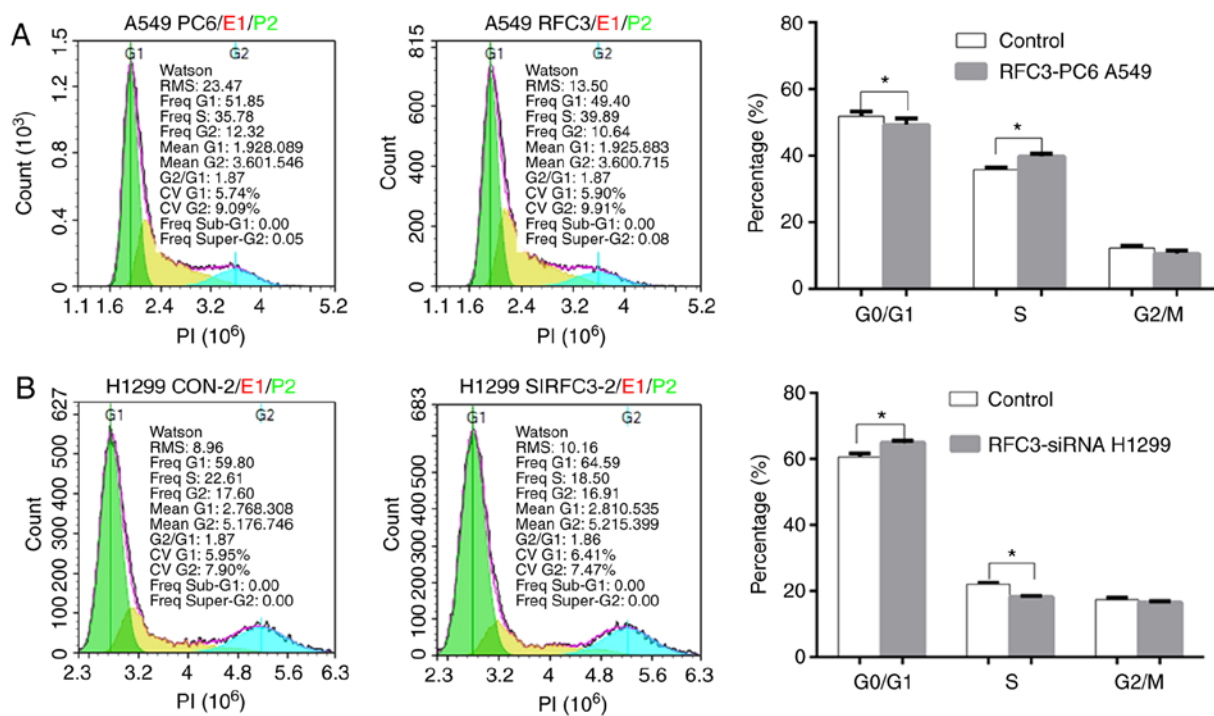

Figure S3. Overexpression or knockdown of RFC3 by overexpression plasmid or siRNA, and their effect on cell survival. (A) RFC3 overexpression plasmid and empty vector were transfected into the lung cancer A549 cell line. (B) RFC3-specific siRNA targeting RFC3 and non-specific control siRNA were transfected into the lung cancer H1299 cell line. Apoptosis was assessed by quantification of Annexin V-positive cells using flow cytometry. Representative images flow cytometry data are and results of three separate experiments were quantified. \*\*P<0.01. FITC, fluorescein isothiocyanate; PI, propidium iodide; RFC3, replication factor C subunit 3; siRNA, small interfering RNA.

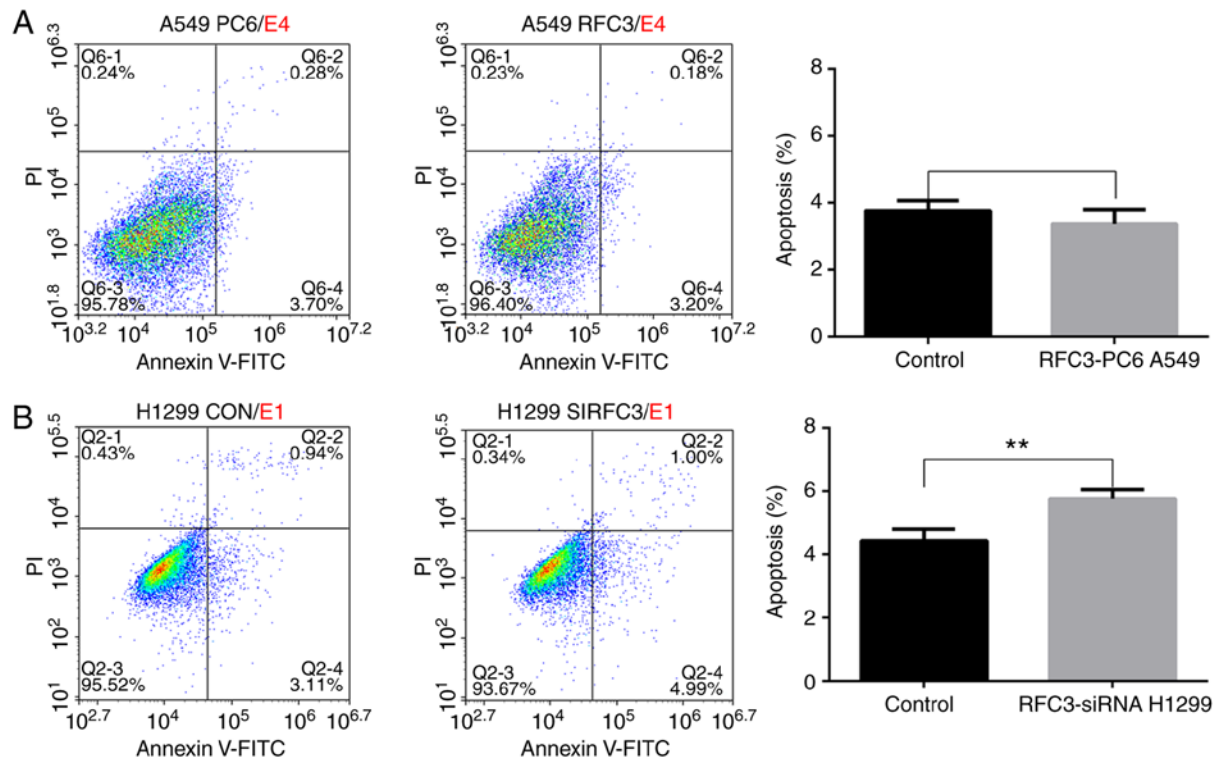

Figure S4. Overexpression or knockdown of RFC3 by overexpression plasmid or siRNA, and their effect on cell survival following the addition of drugs. (A) After adding paclitaxel, RFC3 overexpression plasmid and empty vector were transfected into the lung cancer A549 cell line. (B) After adding erlotinib, RFC3-specific siRNA and non-specific control siRNA were transfected into the lung cancer H1299 cell line. Apoptosis was assessed by quantification of Annexin V-positive cells using flow cytometry. Representative images flow cytometry data are and results of three separate experiments were quantified. \* $P < 0.05$ ; \*\* $P < 0.01$ . FITC, fluorescein isothiocyanate; PI, propidium iodide; RFC3, replication factor C subunit 3; siRNA, small interfering RNA.

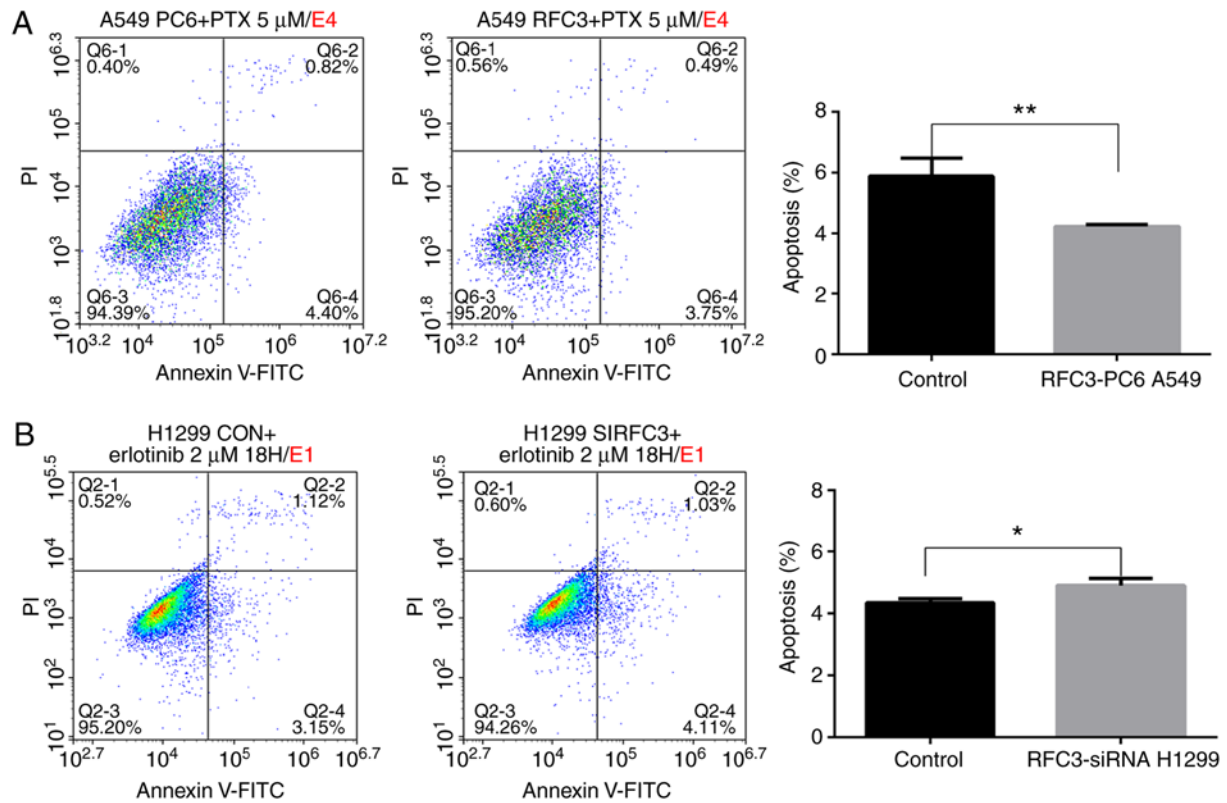

Supplement: Supplementary_Data.pdf [file Supplementary_Data.pdf]
